# Supplementary material
Source: PubMed Central journal article supplement (PMC11029585)
Supplement: 262_2016_1800_MOESM1_ESM.pdf [file 262_2016_1800_MOESM1_ESM.pdf]

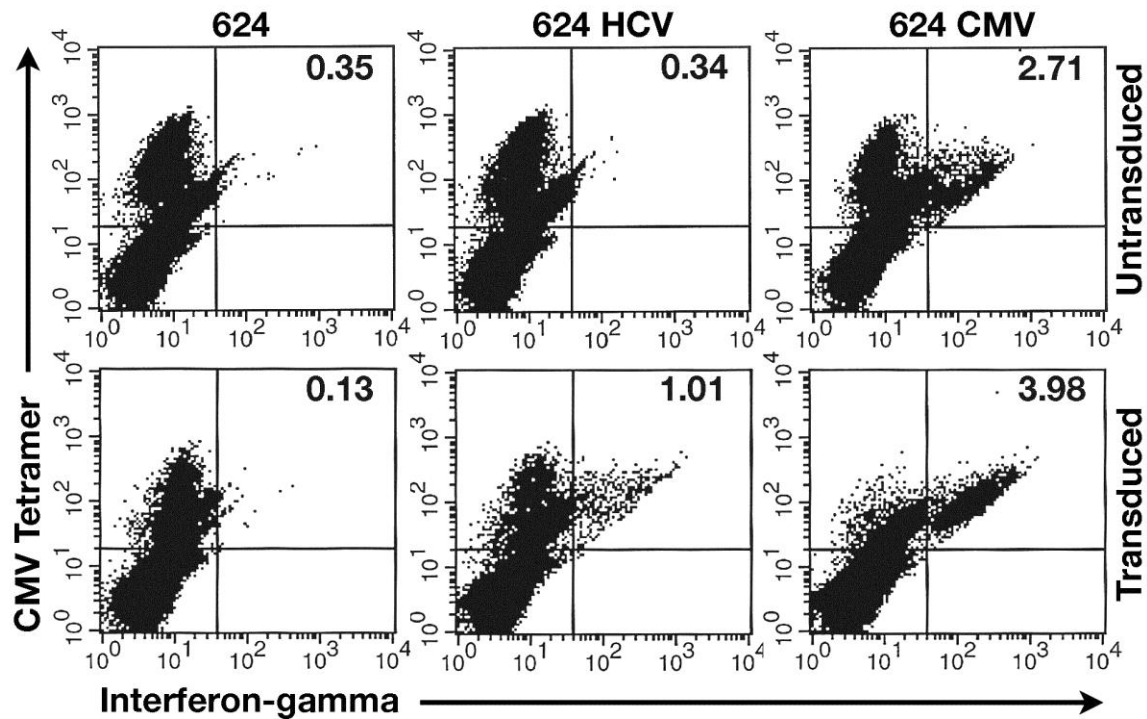

**Supplementary figure S1** Dual-antigen recognition by HCV TCR 1406-transduced CMVpp65:495-503 peptide stimulated T cells. CMVpp65:495-503 peptide-stimulated T cells transduced with the HCV TCR (lower panels) or untransduced (upper panels) were cocultured with 624 MEL cells (left panels), 624 MEL cells expressing HCV NS3:1406-1415 mini-gene (middle panels), or 624 MEL cells expressing CMVpp65:495-503 mini-gene (right panels). The percentage of tetramer/IFN $\gamma$  double-positive cells is shown in the upper right quadrant of each histogram

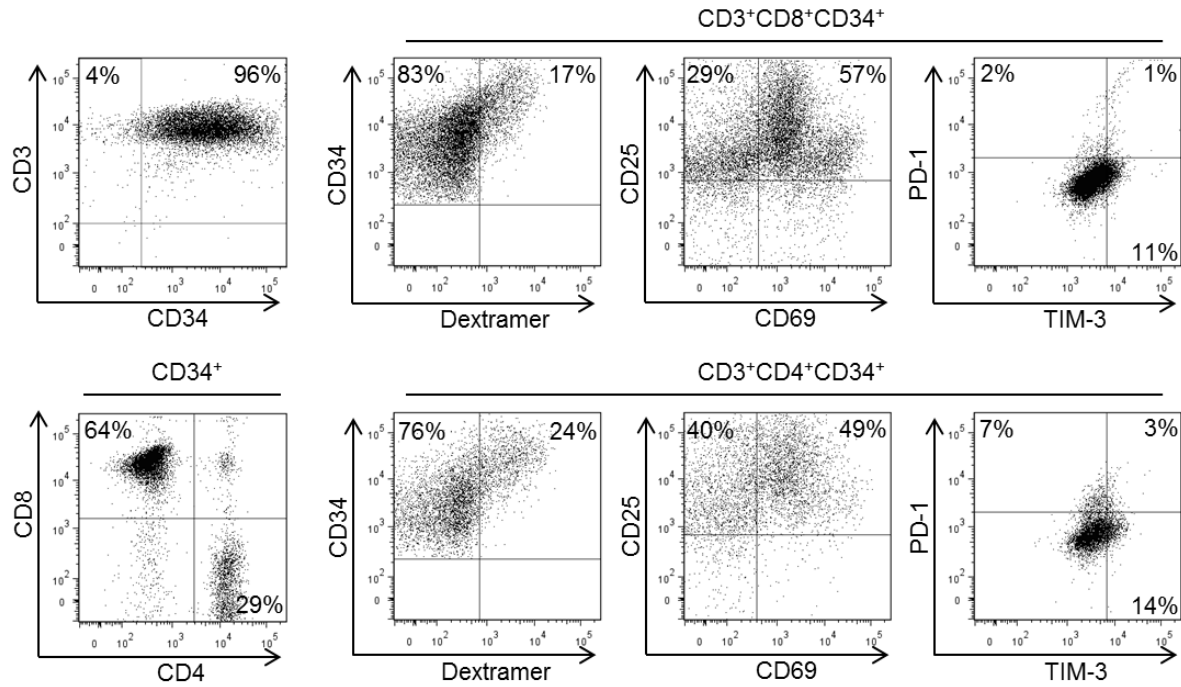

**Supplementary figure S2** Immunofluorescence analysis of HCV1406 TCR-transduced T cells.

PBL, shown from a representative normal donor, were transduced with the HCV1406 TCR retroviral vector and immunomagnetically enriched for CD34<sup>+</sup> expressing cells. Transduction efficiency post-selection was measured by CD34<sup>+</sup> expression. Subpopulations of CD3<sup>+</sup>CD4<sup>+</sup>CD34<sup>+</sup> and CD3<sup>+</sup>CD8<sup>+</sup>CD34<sup>+</sup> were analyzed for HCV NS3:1406-1415 dextramer binding and markers of activation (CD25, CD69) or exhaustion (PD-1, TIM-3)
